# Supplementary material for: Metals (Al, Fe, Zn) doped in single walled carbon nanotubes for catalytic oxidation of H2O to H2O2: a theoretical investigation
Source: Royal Society of Chemistry journal article supplement (doi:10.1039/d2nj02237k), 2022-01-01
Supplement: d2nj02237k1.pdf [file d2nj02237k1.pdf]

## Supplementary Information File

### Metals (Al, Fe, Zn) doped in single walled carbon nanotube for catalytic oxidation of H<sub>2</sub>O to H<sub>2</sub>O<sub>2</sub>: A theoretical investigation

Yang Chen,<sup>a</sup> Shuang Zhang,<sup>a</sup> Dan Mao,<sup>a</sup> Rui-Fang Xie,<sup>a</sup> Qiao-Qiao Qin,<sup>a</sup> Xin-Tong Su,<sup>b</sup> Bin Zhai,<sup>c</sup> Lai-Cai Li <sup>\*a</sup> and Yan Zheng <sup>\*a</sup>

<sup>a</sup> College of Chemistry and Material Science, Sichuan Normal University, Chengdu 610068, China

<sup>b</sup> Chengdu Tongneng Compressed Natural Gas Co., LTD, Chengdu 610037, China

<sup>c</sup> Systems Engineering Research Institute of China State Shipbuilding Corporation, Beijing 100094, China

Email: [zhengyanchem@163.com](mailto:zhengyanchem@163.com); [lilcmail@163.com](mailto:lilcmail@163.com)

#### Contents

**Fig.S1** The optimized configuration diagrams of the reactants, products and each intermediate of the catalytic Path I.

**Fig.S2** The optimized configuration diagrams of the reactants, products and each intermediate of the catalytic Path II.

**Fig.S3** The optimized configuration diagrams of the reactants, products and each intermediate of the catalytic Path III.

**Fig.S4** Electron density diagram of R (Al, Zn, Fe)-SWCNT.

**Table S5** Adsorption energy of H<sub>2</sub>O and O<sub>2</sub> on three catalysts.

**Table S6** Configuration parameters of each stationary point in the reaction process of Path I.

**Table S7** Activation energy of each reaction step of Path I.

**Table S8** Configuration parameters of each stationary point in the reaction process of Path II.

**Table S9** Activation energy of each reaction step of Path II.

**Table S10** Configuration parameters of each stationary point in the reaction process of Path III.

**Table S11** Activation energy of each reaction step of Path III.

**Table S12** Activation energy of each reaction step of Path II for (6,4) SWCNT and (6,6) SWCNT.

**Fig.S13** Diagram of the lattice and the carbon nanotube in it.

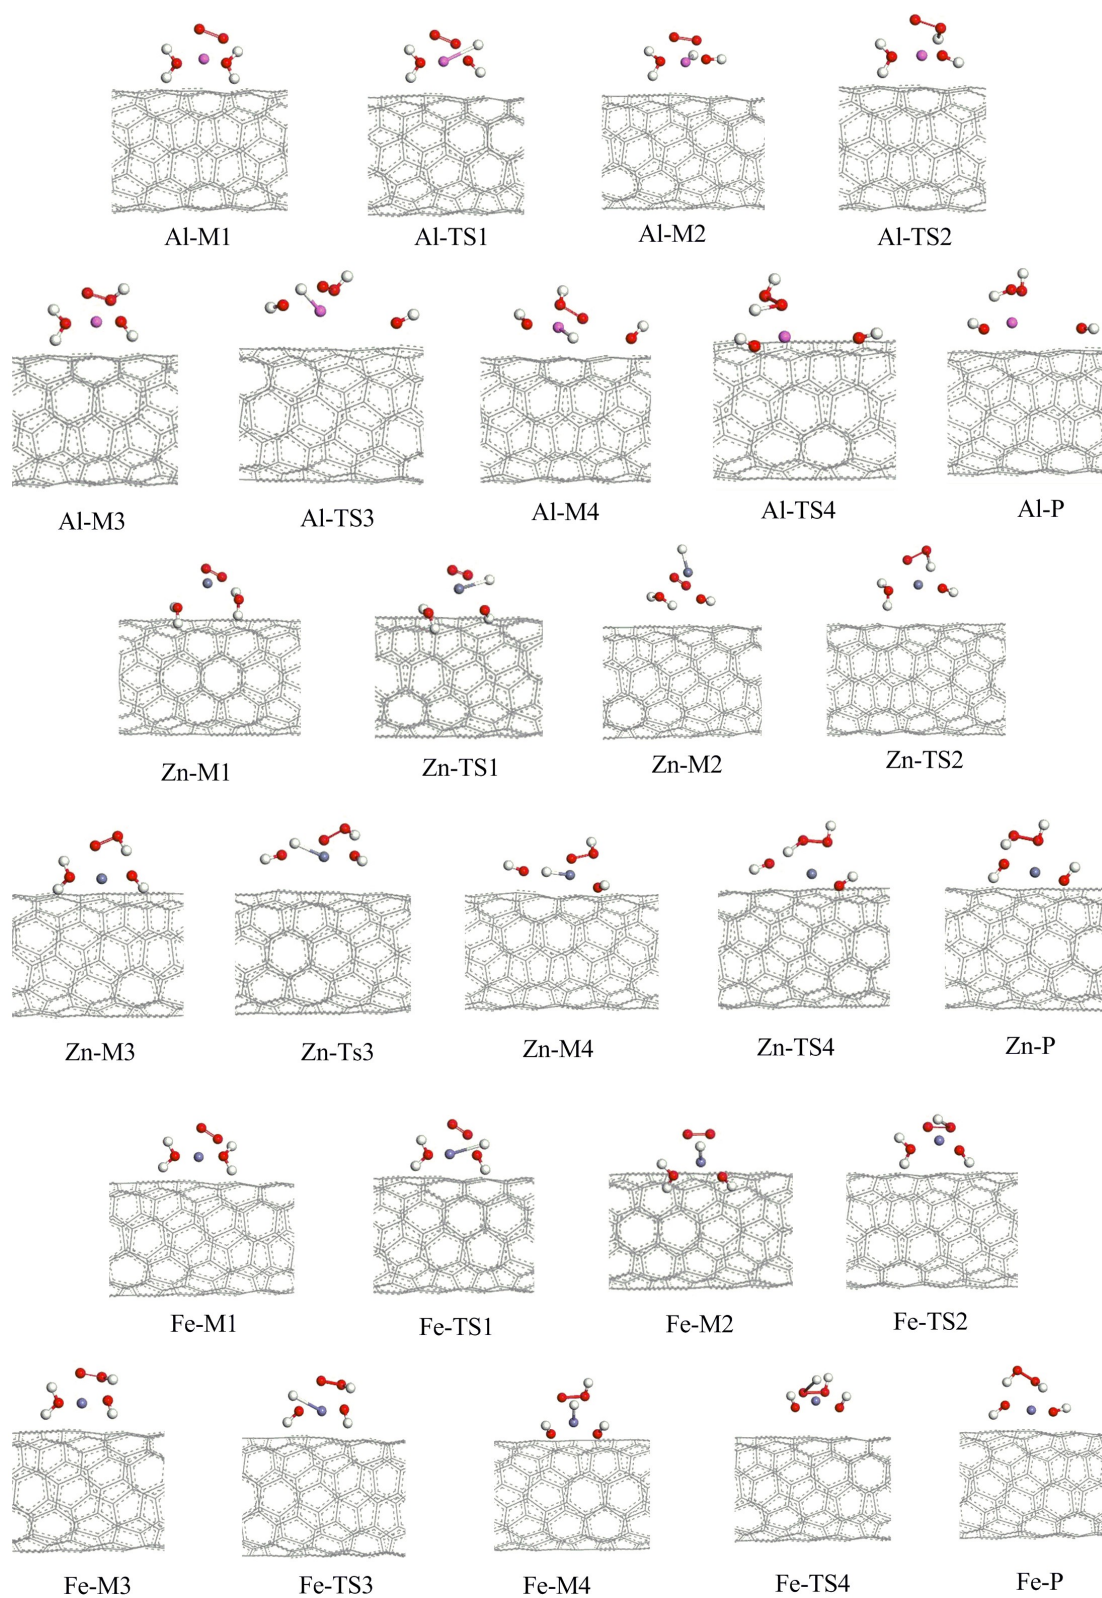

**Fig. S1.** The optimized configuration diagrams of the reactants, products and each intermediate of the catalytic Path I.

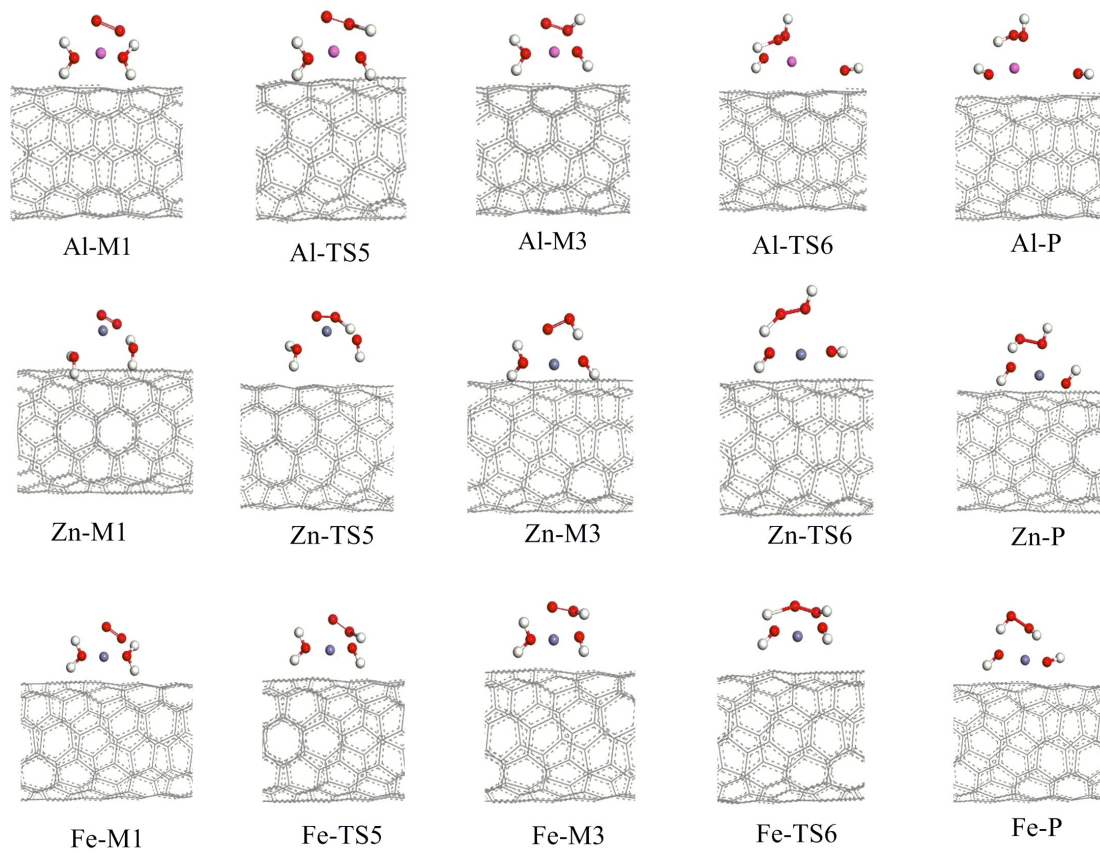

**Fig. S2.** The optimized configuration diagrams of the reactants, products and each intermediate of the catalytic Path II.

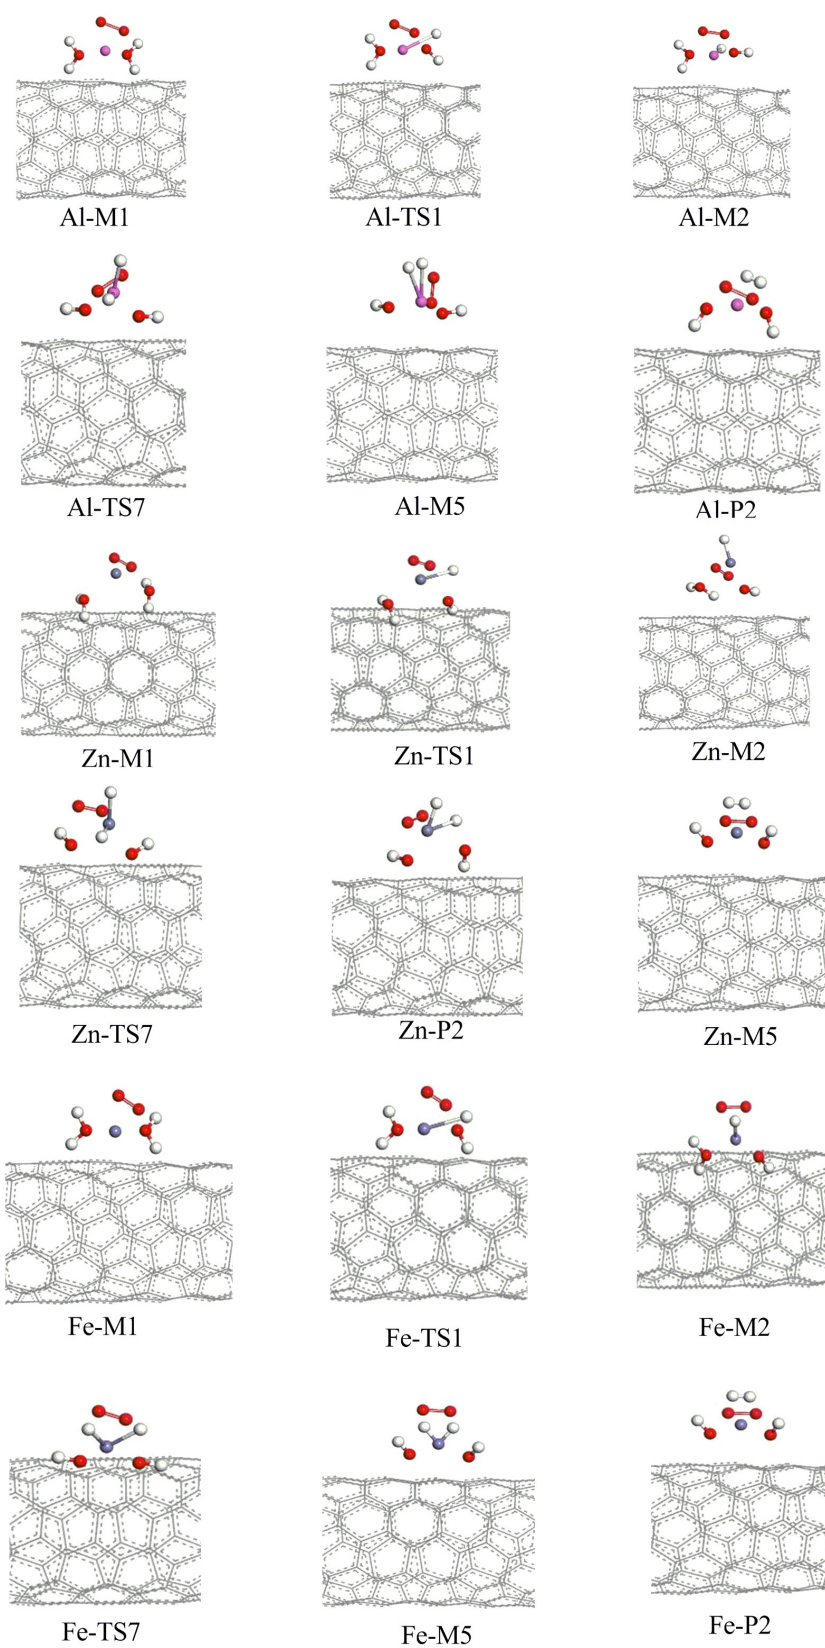

**Fig. S3.** The optimized configuration diagrams of the reactants, products and each intermediate of the catalytic Path III.



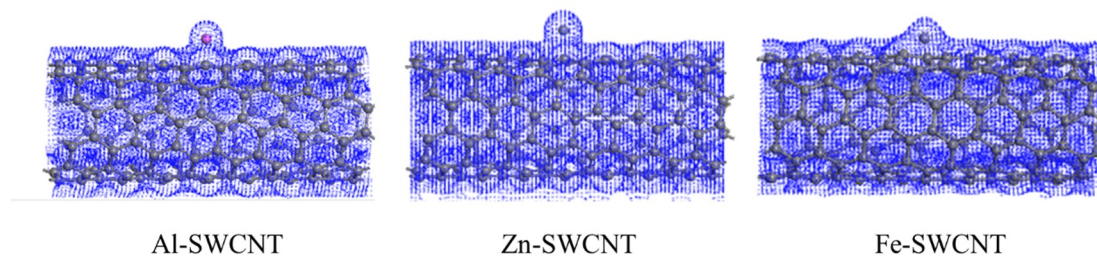

**Fig. S4.** Electron density diagram of R (Al, Zn, Fe)-SWCNT.

**Table S5.** Adsorption energy of H<sub>2</sub>O and O<sub>2</sub> on three catalysts.

| Metal                       | Al1                                                                               | Zn1                                                                               | Fe1                                                                                 | Al2                                                                               | Zn2                                                                               | Fe2                                                                                 | Al                                                                                | Zn                                                                                | Fe                                                                                  |
|-----------------------------|-----------------------------------------------------------------------------------|-----------------------------------------------------------------------------------|-------------------------------------------------------------------------------------|-----------------------------------------------------------------------------------|-----------------------------------------------------------------------------------|-------------------------------------------------------------------------------------|-----------------------------------------------------------------------------------|-----------------------------------------------------------------------------------|-------------------------------------------------------------------------------------|
| Position                    | 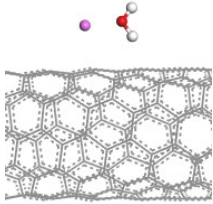 |  |  |  |  |  |  |  |  |
| $E_{\text{ads}}(\text{eV})$ | -0.77                                                                             | -0.31                                                                             | -2.15                                                                               | -0.42                                                                             | -0.30                                                                             | -2.02                                                                               | -1.99                                                                             | -1.17                                                                             | -2.59                                                                               |

**Table S6.** Configuration parameters of each stationary point in the reaction process of Path I.

| Metal | Compounds | Bond length (Å) |           |           |        |           |           |
|-------|-----------|-----------------|-----------|-----------|--------|-----------|-----------|
|       |           | R-H(1)          | H(1)-O(1) | H(1)-O(2) | R-H(3) | H(3)-O(4) | H(3)-O(3) |
| Al    | Al-M1     | 2.524           | 0.997     | 2.100     | 2.419  | 0.998     | —         |
|       | Al-TS1    | 2.226           | 1.845     | —         | —      | —         | —         |
|       | Al-M2     | 1.590           | —         | 2.900     | —      | —         | —         |
|       | Al-TS2    | 2.763           | —         | 1.689     | —      | —         | —         |
|       | Al-M3     | —               | —         | —         | 2.364  | 0.994     | 2.505     |
|       | Al-TS3    | —               | —         | —         | 1.731  | 1.555     | —         |
|       | Al-M4     | —               | —         | —         | 1.574  | —         | 2.825     |
|       | Al-TS4    | —               | —         | —         | 1.986  | —         | 1.707     |
| Zn    | Zn-M1     | 2.406           | 1.020     | 1.626     | 2.808  | 0.977     | —         |
|       | Zn-TS1    | 2.025           | 1.787     | —         | —      | —         | —         |
|       | Zn-M2     | 1.513           | —         | 3.394     | —      | —         | —         |
|       | Zn-TS2    | 2.015           | —         | 2.188     | —      | —         | —         |
|       | Zn-M3     | —               | —         | —         | 2.453  | 0.980     | 2.330     |
|       | Zn-TS3    | —               | —         | —         | 1.912  | 0.203     | —         |
|       | Zn-M4     | —               | —         | —         | 1.555  | —         | 2.825     |
|       | Zn-TS4    | —               | —         | —         | 1.905  | —         | 2.021     |
| Fe    | Fe-M1     | 2.182           | 0.997     | 1.868     | 2.503  | 0.977     | —         |
|       | Fe-TS1    | 1.827           | 1.572     | —         | —      | —         | —         |
|       | Fe-M2     | 1.465           | —         | 2.415     | —      | —         | —         |
|       | Fe-TS2    | 1.880           | —         | 1.697     | —      | —         | —         |
|       | Fe-M3     | —               | —         | —         | 2.450  | 0.979     | 2.550     |
|       | Fe-TS3    | —               | —         | —         | 1.955  | 1.616     | —         |
|       | Fe-M4     | —               | —         | —         | 1.483  | —         | 2.413     |
|       | Fe-TS4    | —               | —         | —         | 2.014  | —         | 1.528     |

**Table S7.** Activation energy of each reaction step of Path I.

| Path   | Metal | Compounds | $E_r$ (kcal/mol) | $E_a$ (kcal/mol) |
|--------|-------|-----------|------------------|------------------|
| Path I | Al    | Al-M1     | 0.00             |                  |
|        |       | Al-TS1    | 35.39            | 35.39            |
|        |       | Al-M2     | -20.35           |                  |
|        |       | Al-TS2    | -15.89           | 4.47             |
|        |       | Al-M3     | -19.96           |                  |
|        |       | Al-TS3    | 33.11            | 53.07            |
|        |       | Al-M4     | 37.15            |                  |
|        |       | Al-TS4    | 126.90           | 89.74            |
|        |       | Al-P      | 67.84            |                  |
|        | Fe    | Fe-M1     | 0.00             |                  |
|        |       | Fe-TS1    | 72.96            | 72.96            |
|        |       | Fe-M2     | 34.26            |                  |
|        |       | Fe-TS2    | 84.29            | 50.03            |
|        |       | Fe-M3     | 7.98             |                  |
|        |       | Fe-TS3    | 103.22           | 95.24            |
|        |       | Fe-M4     | 33.50            |                  |
|        |       | Fe-TS4    | 112.71           | 79.22            |
|        |       | Fe-P      | 16.88            |                  |
|        | Zn    | Zn-M1     | 0.00             |                  |
|        |       | Zn-TS1    | 69.64            | 69.64            |
|        |       | Zn-M2     | 0.46             |                  |
|        |       | Zn-TS2    | 62.70            | 62.24            |
|        |       | Zn-M3     | 7.79             |                  |
|        |       | Zn-TS3    | 117.98           | 110.19           |
| Zn-M4  |       | 49.62     |                  |                  |
| Zn-TS4 |       | 97.64     | 48.02            |                  |
| Zn-P   |       | -1.15     |                  |                  |



**Table S8.** Configuration parameters of each stationary point in the reaction process of Path II.

| Metal | Compounds | Bond length (Å) |           |           |        |           |           |
|-------|-----------|-----------------|-----------|-----------|--------|-----------|-----------|
|       |           | R-H(1)          | H(1)-O(1) | H(1)-O(2) | R-H(3) | H(3)-O(4) | H(3)-O(3) |
| Al    | Al-M1     | 2.524           | 0.997     | 2.100     | 2.419  | 0.998     | —         |
|       | Al-M3     | —               | —         | —         | 2.364  | 0.994     | 2.505     |
|       | Al-TS5    | —               | 1.690     | 1.680     | —      | —         | —         |
|       | Al-TS6    | —               | —         | —         | —      | 1.462     | 1.469     |
| Zn    | Zn-M1     | 2.406           | 1.020     | 1.626     | 2.808  | 0.977     | —         |
|       | Zn-M3     | —               | —         | —         | 2.453  | 0.980     | 2.330     |
|       | Zn-TS5    | —               | 1.282     | 1.386     | —      | —         | —         |
|       | Zn-TS6    | —               | —         | —         | —      | 1.306     | 1.705     |
| Fe    | Fe-M1     | 2.182           | 0.997     | 1.868     | 2.503  | 0.977     | —         |
|       | Fe-M3     | —               | —         | —         | 2.450  | 0.979     | 2.550     |
|       | Fe-TS5    | —               | 1.420     | 1.400     | —      | —         | —         |
|       | Fe-TS6    | —               | —         | —         | —      | 1.291     | 1.734     |

**Table S9.** Activation energy of each reaction step of Path II.

| Path    | Metal  | Compounds | $E_r$ (kcal/mol) | $E_a$ (kcal/mol) |
|---------|--------|-----------|------------------|------------------|
| Path II | Al     | Al-M1     | 0.00             | 30.51            |
|         |        | Al-TS5    | 30.51            |                  |
|         |        | Al-M3     | -19.96           | 24.81            |
|         |        | Al-TS6    | 4.85             |                  |
|         |        | Al-P      | -1.35            |                  |
|         | Fe     | Fe-M1     | 0.00             | 18.67            |
|         |        | Fe-TS5    | 18.67            |                  |
|         |        | Fe-M3     | 7.98             | 61.81            |
|         |        | Fe-TS6    | 69.79            |                  |
|         |        | Fe-P      | 16.88            |                  |
| Zn      | Zn-M1  | 0.00      | 6.62             |                  |
|         | Zn-TS5 | 6.62      |                  |                  |
|         | Zn-M3  | 7.79      | 38.21            |                  |
|         | Zn-TS6 | 46.00     |                  |                  |
|         | Zn-P   | -1.15     |                  |                  |

**Table S10.** Configuration parameters of each stationary point in the reaction process of Path III.

| Metal | Compounds | Bond length (Å) |           |           |        |           |           |
|-------|-----------|-----------------|-----------|-----------|--------|-----------|-----------|
|       |           | R-H(1)          | H(1)-O(1) | H(1)-O(2) | R-H(3) | H(3)-O(4) | H(3)-O(3) |
| Al    | Al-M1     | 2.524           | 0.997     | 2.100     | 2.419  | 0.998     | —         |
|       | Al-TS1    | 2.226           | 1.845     | —         | —      | —         | —         |
|       | Al-M2     | 1.590           | —         | 2.900     | —      | —         | —         |
|       | Al-TS7    | 2.110           | 1.685     | —         | 2.318  | 1.280     | —         |
| Zn    | Zn-M1     | 2.406           | 1.020     | 1.626     | 2.808  | 0.977     | —         |
|       | Zn-TS1    | 2.025           | 1.787     | —         | —      | —         | —         |
|       | Zn-M2     | 1.513           | —         | 3.394     | —      | —         | —         |
|       | Zn-TS7    | 2.350           | 2.488     | —         | 2.413  | 2.067     | —         |
| Fe    | Fe-M1     | 2.182           | 0.997     | 1.868     | 2.503  | 0.977     | —         |
|       | Fe-TS1    | 1.827           | 1.572     | —         | —      | —         | —         |
|       | Fe-M2     | 1.465           | —         | 2.415     | —      | —         | —         |
|       | Fe-TS7    | 1.912           | 1.615     | —         | 2.078  | 1.643     | —         |

**Table S11.** Activation energy of each reaction step of Path III.

| Path     | Metal | Compounds | $E_r$ (kcal/mol) | $E_a$ (kcal/mol) |
|----------|-------|-----------|------------------|------------------|
| Path III | Al    | Al-M1     | 0.00             |                  |
|          |       | Al-TS1    | 35.39            | 35.39            |
|          |       | Al-M2     | -20.35           |                  |
|          |       | Al-TS7    | 61.63            | 81.98            |
|          |       | Al-M5     | 5.02             |                  |
|          |       | Al-P2     | -21.63           |                  |
|          | Fe    | Fe-M1     | 0.00             |                  |
|          |       | Fe-TS1    | 72.96            | 72.96            |
|          |       | Fe-M2     | 34.26            |                  |
|          |       | Fe-TS7    | 89.72            | 55.46            |
|          |       | Fe-M5     | 3.15             |                  |
|          |       | Fe-P2     | -1.13            |                  |
|          | Zn    | Zn-M1     | 0.00             |                  |
|          |       | Zn-TS1    | 69.64            | 69.64            |
| Zn-M2    |       | 0.46      |                  |                  |
| Zn-TS7   |       | 115.58    | 115.12           |                  |
| Zn-M5    |       | 28.16     |                  |                  |
| Zn-P2    |       | 10.01     |                  |                  |

**Table S12.** Activation energy of each reaction step of Path II for (6,4) SWCNT and (6,6) SWCNT.

| Path    | SWCNT | Compounds | $E_r$ (kcal/mol) | $E_a$ (kcal/mol) |
|---------|-------|-----------|------------------|------------------|
| Path II | (6,4) | Al-M1     | 0.00             |                  |
|         |       | Al-TS5    | 30.51            | 30.51            |
|         |       | Al-M3     | -19.96           |                  |
|         |       | Al-TS6    | 4.85             | 24.81            |
|         |       | Al-P      | -1.35            |                  |
|         | (6,6) | Al-M1     | 0.00             |                  |
|         |       | Al-TS5    | 60.65            | 60.65            |
|         |       | Al-M3     | 33.42            |                  |
|         |       | Al-TS6    | 48.36            | 14.94            |
|         |       | Al-P      | 35.29            |                  |

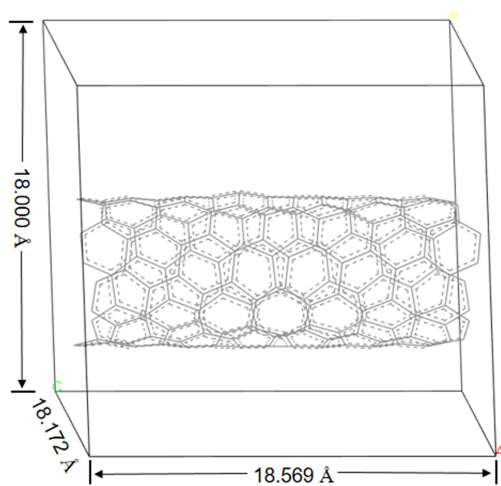

**Fig. S13.** Diagram of the lattice and the carbon nanotube in it.
